# Supplementary material for: Pentacobalt(ii) cluster based pcu network exhibits both magnetic slow-relaxation and hysteresis behaviour
Source: Royal Society of Chemistry journal article supplement (doi:10.1039/c0dt01062f), 2010-11-11
Supplement: c0dt01062f.pdf [file c0dt01062f.pdf]

**ELECTRONIC SUPPLEMENTARY DATA**

for

**Pentacobalt(II) Cluster Based pcu Network  
Exhibits Both Magnetic Slow-Relaxation  
and Hysteresis Behaviour**

Sheng Hu,<sup>†,‡</sup> Jun-Liang Liu,<sup>†</sup> Zhao-Sha Meng,<sup>†</sup> Yan-Zhen Zheng,<sup>\*,§</sup> Yanhua Lan,<sup>§</sup>

Annie. K. Powell,<sup>§</sup> and Ming-Liang Tong<sup>\*,†</sup>

<sup>†</sup>*Key Laboratory of Bioinorganic and Synthetic Chemistry of Ministry of Education, Sun Yat-Sen University, Guangzhou 510275, China,* <sup>‡</sup>*Faculty of Chemical Engineering and Light Industry, Guangdong University of Technology, Guangzhou 510006, China, and* <sup>§</sup>*Institut für Anorganische Chemie de Universität Karlsruhe, Engesserstrasse Geb. 30.45 76128 Karlsruhe, Germany.*

E-mail: [tongml@mail.sysu.edu.cn](mailto:tongml@mail.sysu.edu.cn) (MLT) and [zhengyanzhen@gmail.com](mailto:zhengyanzhen@gmail.com) (YZZ)

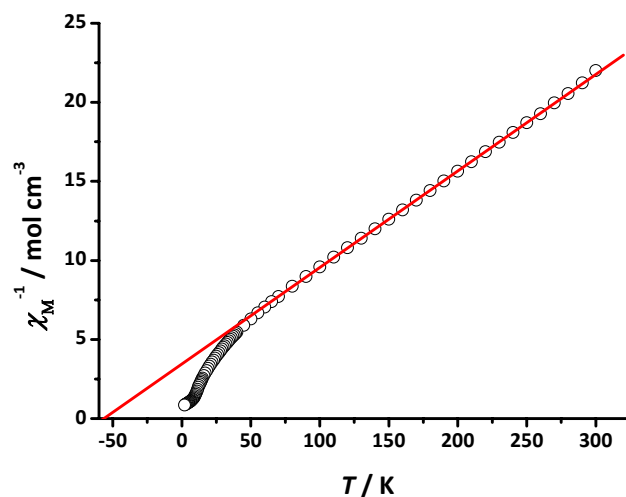

**Fig. S1.** Plots of  $\chi_M^{-1}$  versus temperature for **1**.

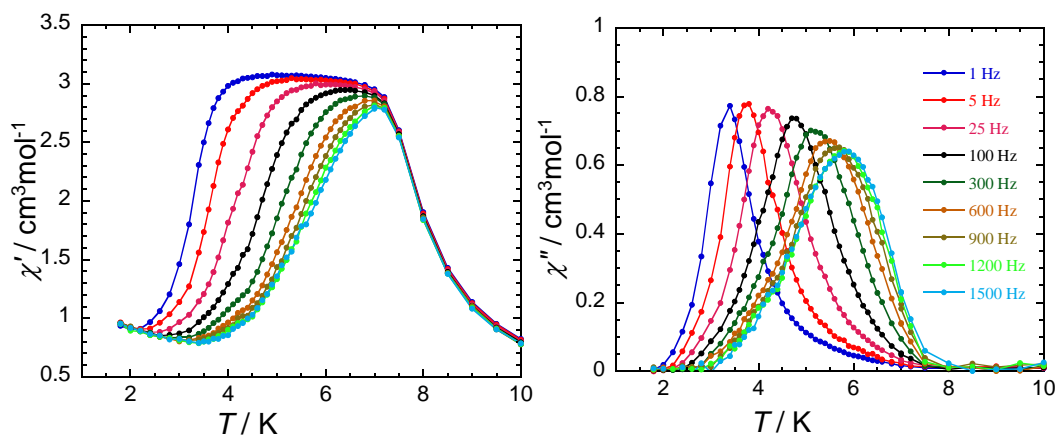

**Fig. S2.** The zero dc field of  $\chi'(T)$  (a) and  $\chi''(T)$  (b) plots of **1** at indicated frequencies in 5 Oe oscillating ac field.

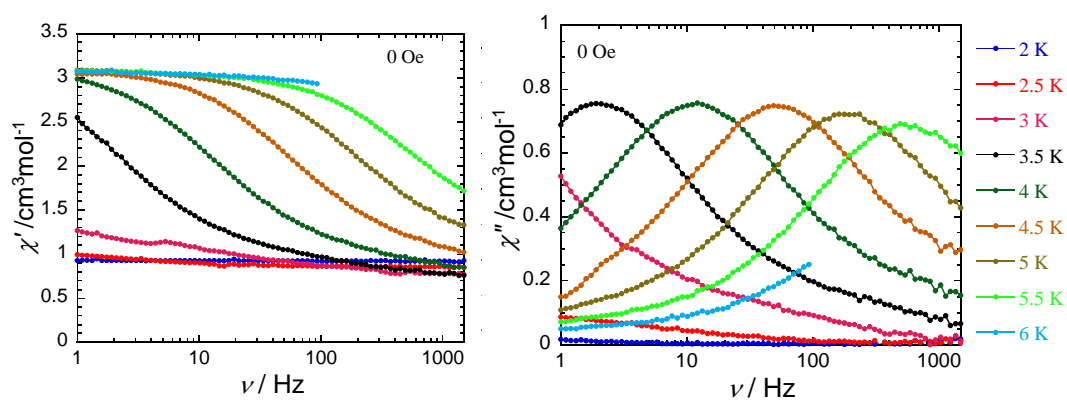

**Fig. S3.** The isothermal  $\chi'(\nu)$  (c) and  $\chi''(\nu)$  (d) plots of **1** at indicated temperatures.

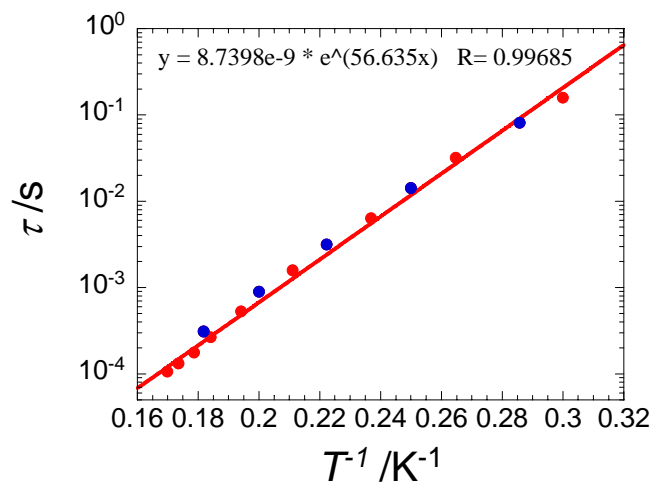

**Fig. S4.** The logarithm of  $\tau$  vs  $T^{-1}$  plot (e) obtained from  $\chi''(T)$  (red dots) and  $\chi''(\nu)$  (blue dots); Linear fitted by Arrhenius law with the energy barrier of 56.635 K.

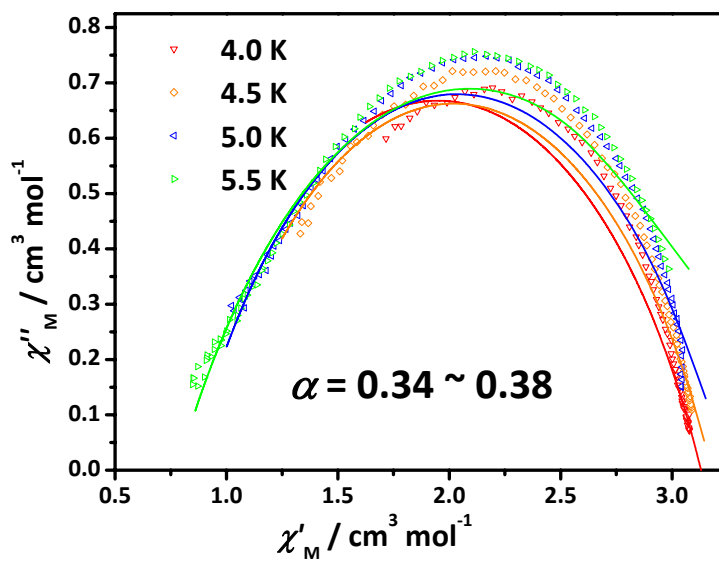

**Fig. S5.** The Cole-Cole plots and the fitting curves (solid lines).

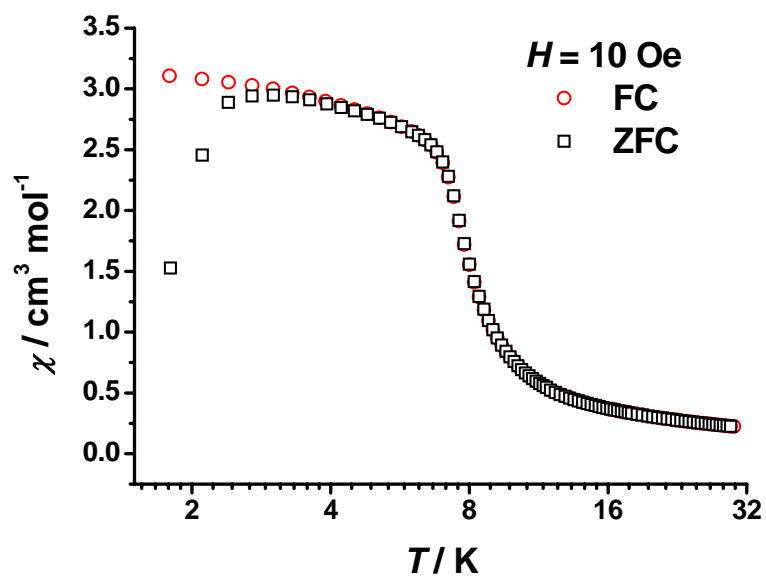

**Fig. S6.** FCM and ZFCM data collected in an applied field of 10 Oe of **1**.

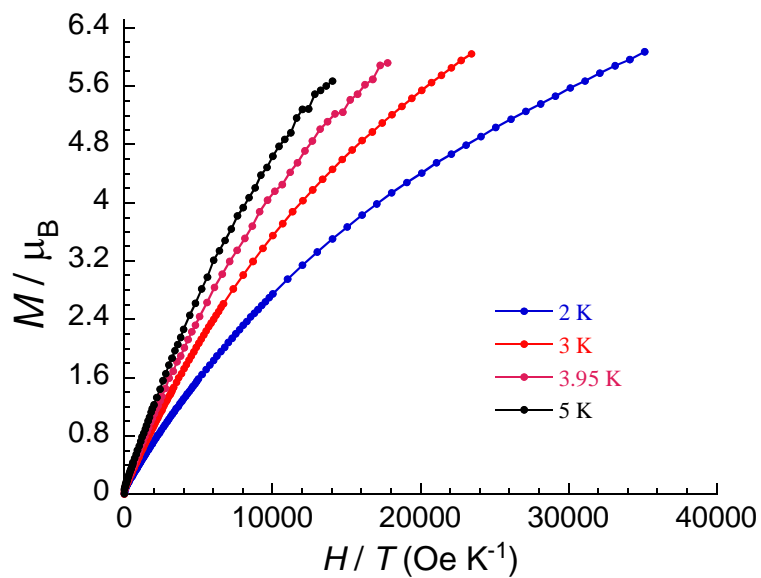

**Fig. S7.** The  $M$  vs  $H/T$  plots at indicated temperatures.

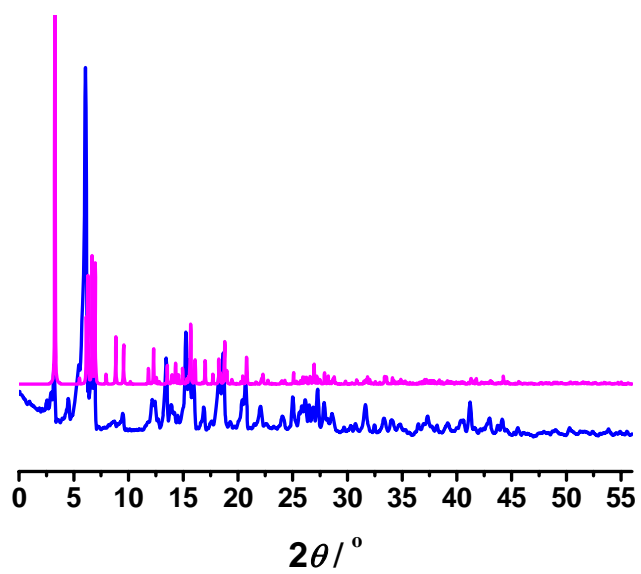

**Fig. S8.** Simulated (purple) & experimental (blue) XRPD data for **1**.
